# Supplementary material for: Age-Specific Determinants of Depression Prevalence: Insights from Pre- and Post-COVID- 19 Pandemic Analysis
Source: Research Square preprint supplement (doi:10.21203/rs.3.rs-6475145/v1), 2025-06-02
Supplement: Supplementary file 1 [file 4ecba710a206d6231396af36.xlsx]

## Sheet: Sheet1
		20-44 years group			45-64 years group			65-80 years group
Characteristics	Non-depression	Depression	P value	Non-depression	Depression	P value	Non-depression	Depression	P value
COVID experience	0.419 (0.377 to 0.462)	0.619 (0.556 to 0.678)	<0.001*	0.473 (0.428 to 0.518)	0.517 (0.437 to 0.596)	0.19481	0.572 (0.518 to 0.625)	0.578 (0.471 to 0.679)	0.89534
Sex			0.05454			<0.001*			0.010*
Male	0.543 (0.500 to 0.585)	0.485 (0.424 to 0.547)		0.528 (0.482 to 0.574)	0.406 (0.331 to 0.485)		0.540 (0.488 to 0.591)	0.419 (0.326 to 0.518)
Female	0.457 (0.415 to 0.500)	0.515 (0.453 to 0.576)		0.472 (0.426 to 0.518)	0.594 (0.515 to 0.669)		0.460 (0.409 to 0.512)	0.581 (0.482 to 0.674)
Marital status			0.46808			0.62627			0.028*
Yes	0.589 (0.546 to 0.632)	0.624 (0.563 to 0.681)		0.645 (0.600 to 0.688)	0.614 (0.536 to 0.687)		0.569 (0.516 to 0.62 )	0.609 (0.505 to 0.703)
No	0.198 (0.165 to 0.236)	0.174 (0.134 to 0.224)		0.169 (0.139 to 0.204)	0.189 (0.137 to 0.253)		0.201 (0.163 to 0.246)	0.259 (0.182 to 0.354)
Uncertain	0.212 (0.177 to 0.252)	0.202 (0.157 to 0.256)		0.186 (0.152 to 0.226)	0.197 (0.143 to 0.266)		0.23 (0.187 to 0.279)	0.133 (0.072 to 0.231)
Activity group			0.012*			<0.001*			<0.001*
<1 times/week	0.235 (0.200 to 0.274)	0.276 (0.224 to 0.335)		0.263 (0.225 to 0.305)	0.349 (0.281 to 0.424)		0.270 (0.227 to 0.318)	0.413 (0.317 to 0.517)
1-2 times/week	0.156 (0.126 to 0.192)	0.202 (0.158 to 0.254)		0.177 (0.144 to 0.216)	0.250 (0.180 to 0.337)		0.143 (0.109 to 0.186)	0.225 (0.150 to 0.324)
≥3 times/week	0.609 (0.565 to 0.650)	0.523 (0.461 to 0.583)		0.560 (0.514 to 0.605)	0.401 (0.327 to 0.479)		0.587 (0.535 to 0.638)	0.362 (0.273 to 0.461)
Education			0.024*			0.43229			0.13068
Less than 9th grade	0.012 (0.007 to 0.021)	0.012 (0.005 to 0.031)		0.014 (0.007 to 0.027)	0.019 (0.010 to 0.036)		0.011 (0.006 to 0.021)	0.029 (0.014 to 0.061)
9-11th grade	0.033 (0.024 to 0.047)	0.048 (0.033 to 0.071)		0.055 (0.038 to 0.079)	0.063 (0.038 to 0.103)		0.043 (0.025 to 0.073)	0.077 (0.039 to 0.144)
High school graduate	0.191 (0.158 to 0.230)	0.195 (0.150 to 0.250)		0.212 (0.176 to 0.254)	0.228 (0.167 to 0.304)		0.237 (0.195 to 0.286)	0.262 (0.183 to 0.360)
College or AA degree	0.304 (0.267 to 0.344)	0.376 (0.320 to 0.435)		0.301 (0.262 to 0.344)	0.337 (0.270 to 0.412)		0.284 (0.240 to 0.333)	0.283 (0.200 to 0.385)
College graduate or above	0.459 (0.416 to 0.503)	0.369 (0.310 to 0.432)		0.417 (0.372 to 0.463)	0.353 (0.277 to 0.436)		0.424 (0.374 to 0.476)	0.348 (0.258 to 0.451)
Race and ethnicity			0.049*			0.017*			0.36437
Mexican American	0.101 (0.083 to 0.124)	0.090 (0.065 to 0.125)		0.064 (0.048 to 0.085)	0.065 (0.043 to 0.098)		0.025 (0.017 to 0.038)	0.006 (0.001 to 0.029)
Other Hispanic	0.071 (0.055 to 0.092)	0.087 (0.063 to 0.120)		0.055 (0.041 to 0.072)	0.106 (0.070 to 0.158)		0.037 (0.026 to 0.053)	0.067 (0.037 to 0.120)
Non-Hispanic White	0.636 (0.597 to 0.673)	0.601 (0.543 to 0.657)		0.709 (0.671 to 0.744)	0.647 (0.575 to 0.714)		0.817 (0.783 to 0.847)	0.819 (0.747 to 0.874)
Non-Hispanic Black	0.087 (0.071 to 0.105)	0.114 (0.086 to 0.150)		0.093 (0.075 to 0.114)	0.110 (0.076 to 0.156)		0.067 (0.049 to 0.089)	0.045 (0.023 to 0.087)
Non-Hispanic Asian	0.060 (0.045 to 0.080)	0.035 (0.017 to 0.072)		0.046 (0.032 to 0.064)	0.023 (0.012 to 0.044)		0.023 (0.014 to 0.037)	0.022 (0.009 to 0.054)
Other Race	0.045 (0.032 to 0.063)	0.072 (0.050 to 0.102)		0.035 (0.022 to 0.055)	0.048 (0.023 to 0.098)		0.031 (0.019 to 0.050)	0.040 (0.018 to 0.088)
Family income to poverty ratio			<0.001*			<0.001*			0.009*
<1	0.070 (0.056 to 0.089)	0.146 (0.113 to 0.188)		0.066 (0.051 to 0.087)	0.089 (0.06 to 0.129)		0.034 (0.022 to 0.053)	0.048 (0.026 to 0.086)
1-3	0.315 (0.279 to 0.353)	0.370 (0.315 to 0.428)		0.211 (0.179 to 0.247)	0.327 (0.262 to 0.399)		0.265 (0.226 to 0.309)	0.386 (0.296 to 0.484)
3-5	0.614 (0.574 to 0.653)	0.484 (0.423 to 0.545)		0.723 (0.684 to 0.759)	0.584 (0.508 to 0.656)		0.700 (0.655 to 0.742)	0.566 (0.467 to 0.660)
Alcohol abuse			<0.001*			<0.001*			<0.001*
<4/5 drinks per day	0.926 (0.904 to 0.944)	0.808 (0.757 to 0.851)		0.882 (0.853 to 0.906)	0.740 (0.669 to 0.801)		0.888 (0.847 to 0.919)	0.762 (0.663 to 0.839)
≥4/5 drinks per day	0.074 (0.056 to 0.096)	0.192 (0.149 to 0.243)		0.118 (0.094 to 0.147)	0.260 (0.199 to 0.331)		0.112 (0.081 to 0.153)	0.238 (0.161 to 0.337)
Smoking	0.670 (0.638 to 0.700)	0.611 (0.564 to 0.657)	0.044*	0.579 (0.547 to 0.611)	0.456 (0.401 to 0.512)	0.004*	0.513 (0.473 to 0.554)	0.479 (0.398 to 0.561)	0.17295
BMI group			0.003*			<0.001*			<0.001*
<18.5	0.012 (0.006 to 0.024)	0.011 (0.004 to 0.030)		0.006 (0.002 to 0.017)	0.019 (0.004 to 0.089)		0.006 (0.002 to 0.016)	0.009 (0.001 to 0.065)
18.5-25	0.310 (0.272 to 0.352)	0.281 (0.227 to 0.341)		0.228 (0.191 to 0.270)	0.252 (0.183 to 0.336)		0.232 (0.191 to 0.279)	0.158 (0.100 to 0.239)
≥25-30	0.319 (0.280 to 0.362)	0.245 (0.197 to 0.300)		0.400 (0.355 to 0.446)	0.261 (0.199 to 0.335)		0.419 (0.369 to 0.470)	0.299 (0.217 to 0.397)
≥30	0.358 (0.318 to 0.400)	0.464 (0.404 to 0.525)		0.366 (0.324 to 0.410)	0.468 (0.391 to 0.547)		0.344 (0.295 to 0.395)	0.534 (0.433 to 0.632)
Diabetes			<0.001*			0.015*			0.20123
Yes	0.027 (0.016 to 0.047)	0.025 (0.014 to 0.044)		0.114 (0.09 to 0.143)	0.119 (0.084 to 0.165)		0.162 (0.129 to 0.200)	0.209 (0.143 to 0.295)
No	0.971 (0.952 to 0.983)	0.954 (0.93 to 0.970)		0.859 (0.828 to 0.886)	0.817 (0.757 to 0.865)		0.816 (0.776 to 0.850)	0.753 (0.664 to 0.824)
Borderline	0.001 (0.000 to 0.005)	0.021 (0.011 to 0.040)		0.027 (0.016 to 0.044)	0.064 (0.035 to 0.115)		0.022 (0.013 to 0.038)	0.038 (0.016 to 0.087)
Respiratory diseases	0.215 (0.183 to 0.250)	0.307 (0.254 to 0.366)	<0.001*	0.376 (0.334 to 0.421)	0.535 (0.456 to 0.612)	<0.001*	0.430 (0.38 to 0.483)	0.450 (0.354 to 0.551)	0.66666
heart and brain diseases	0.011 (0.005 to 0.022)	0.006 (0.002 to 0.018)	0.44956	0.051 (0.037 to 0.072)	0.132 (0.088 to 0.194)	<0.001*	0.140 (0.112 to 0.174)	0.270 (0.189 to 0.371)	<0.001*
Arthritis	0.068 (0.051 to 0.091)	0.104 (0.072 to 0.148)	0.027*	0.330 (0.289 to 0.374)	0.463 (0.385 to 0.544)	<0.001*	0.505 (0.453 to 0.556)	0.542 (0.439 to 0.641)	0.129
Thyroid diseases	0.049 (0.034 to 0.069)	0.051 (0.032 to 0.079)	0.87533	0.128 (0.100 to 0.162)	0.124 (0.084 to 0.181)	0.8667	0.175 (0.139 to 0.219)	0.301 (0.212 to 0.408)	0.00078
liver diseases	0.015 (0.008 to 0.028)	0.043 (0.025 to 0.073)	0.002*	0.046 (0.031 to 0.067)	0.081 (0.049 to 0.132)	0.023*	0.039 (0.022 to 0.067)	0.056 (0.024 to 0.128)	0.34622
Gallstones	0.038 (0.025 to 0.058)	0.061 (0.040 to 0.091)	0.06824	0.111 (0.083 to 0.148)	0.158 (0.101 to 0.238)	0.038*	0.149 (0.114 to 0.191)	0.119 (0.072 to 0.19)	0.36934
cancer	0.023 (0.013 to 0.042)	0.034 (0.017 to 0.066)	0.27183	0.108 (0.083 to 0.140)	0.104 (0.064 to 0.163)	0.82869	0.333 (0.287 to 0.383)	0.327 (0.242 to 0.426)	0.8945
Shared meal planning	0.670 (0.628 to 0.709)	0.600 (0.540 to 0.658)	0.015*	0.546 (0.500 to 0.592)	0.577 (0.498 to 0.652)	0.37476	0.478 (0.427 to 0.530)	0.405 (0.312 to 0.507)	0.11813
Main food shopper	0.574 (0.529 to 0.617)	0.645 (0.583 to 0.703)	0.015*	0.631 (0.585 to 0.675)	0.665 (0.587 to 0.735)	0.30276	0.658 (0.607 to 0.706)	0.748 (0.652 to 0.826)	0.039*
Shared food shopping duty	0.684 (0.643 to 0.723)	0.606 (0.546 to 0.663)	0.006*	0.584 (0.538 to 0.629)	0.532 (0.453 to 0.610)	0.12578	0.551 (0.499 to 0.602)	0.490 (0.390 to 0.590)	0.19164
